# Supplementary material for: The adsorption effect of freestanding SiOx-decorated stabilized polyacrylonitrile interlayers in lithium–sulfur batteries
Source: Royal Society of Chemistry journal article supplement (doi:10.1039/c8dt04674c), 2019-01-01
Supplement: c8dt04674c1.pdf [file c8dt04674c1.pdf]

Supporting Information  
for  
Adsorption Effect of Freestanding SiO<sub>x</sub>-decorated  
Stabilized Polyacrylonitrile Interlayers in Lithium-Sulfur  
Batteries

Elif Ceylan Cengiz<sup>a,b</sup>, Ali Ansari Hamedani<sup>c</sup>, Serap Hayat Soytaş<sup>d\*</sup>, Rezan Demir-  
Cakan<sup>b,e\*</sup>

<sup>a</sup> Department of Material Science and Engineering, Gebze Technical University, 41400, Gebze, Kocaeli, Turkey

<sup>b</sup> Institute of Nanotechnology, Gebze Technical University, 41400, Gebze, Kocaeli, Turkey

<sup>c</sup> Faculty of Engineering and Natural Sciences, Sabanci University, 34956, Tuzla, Istanbul, Turkey

<sup>d</sup> Sabanci University SUNUM Nanotechnology Research Center, 34956, Tuzla, Istanbul, Turkey

<sup>e</sup> Department of Chemical Engineering, Gebze Technical University, 41400, Gebze, Kocaeli, Turkey

\* Corresponding Authors:

E-mails: demir-cakan@gtu.edu.tr (Rezan Demir-Cakan); seraphayat@sabanciuniv.edu (Serap Hayat Soytaş)

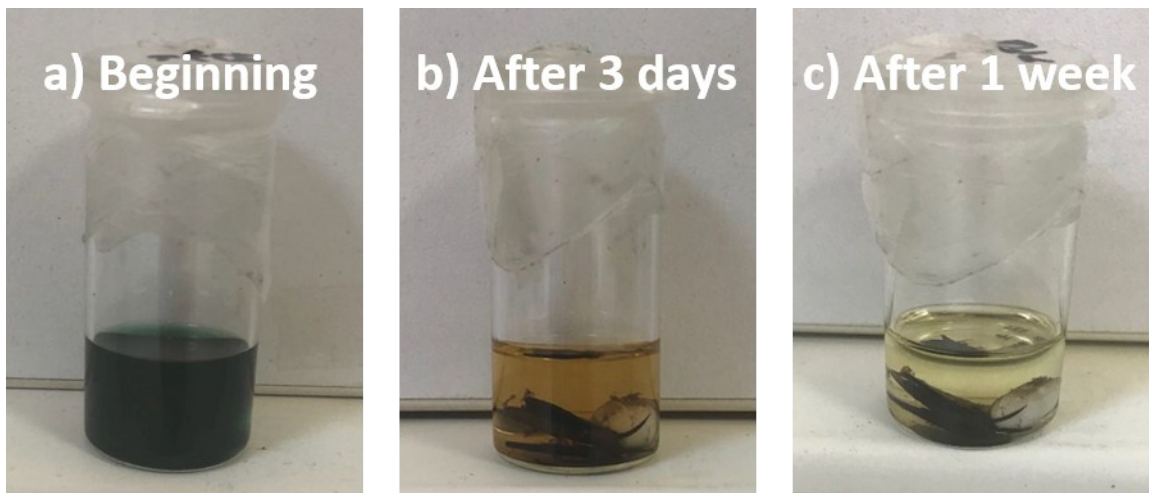

Fig. S1. Adsorption test for observing the adsorption capability of PAN-SiO<sub>x</sub> fiber mat. Color changes of 0.03 M Li<sub>2</sub>S<sub>4</sub> containing DOL solution with PAN-SiO<sub>x</sub> fiber mat a) at the beginning, b) after 3 days and c) after 1 week of soaking.

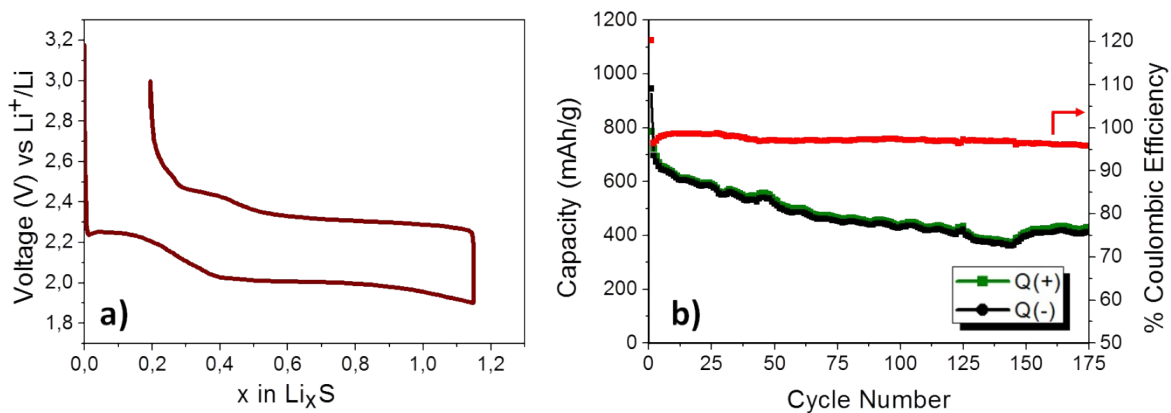

Fig. S2. a) First charge-discharge profile of cell with sPAN-SiO<sub>x</sub> at C/2 rate, b) discharge capacities as a function of cycle number for the cell with sPAN-SiO<sub>x</sub> at C/2 rate.

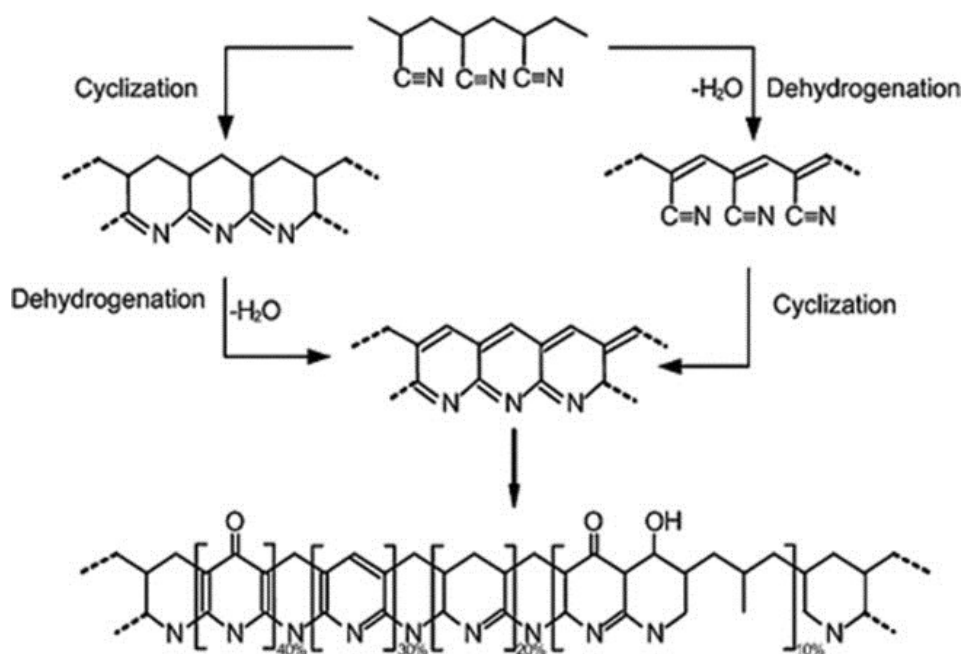

Fig. S3. The evolution of chemical structure of polyacrylonitrile (PAN) during stabilization under air.

Table S1. Electrochemical Impedance Spectra (EIS) results obtained from fitted lines (from Fig. 6b and Fig. 6c).

| <i>Sample</i>                    | <i>Hour</i> | <i>R<sub>ohm</sub> (Ohm)</i> | <i>R<sub>SEI</sub> (Ohm)</i> | <i>R<sub>ct</sub> (Ohm)</i> |
|----------------------------------|-------------|------------------------------|------------------------------|-----------------------------|
| <i>Without Interlayer</i>        | 0           | 9.524                        | 43.49                        | 35.86                       |
|                                  | 60          | 7.751                        | 199.4                        | 99.19                       |
| <i>With sPAN</i>                 | 0           | 7.638                        | 37.05                        | 33.47                       |
|                                  | 60          | 8.856                        | 29.45                        | 157.9                       |
| <i>With sPAN-SiO<sub>x</sub></i> | 0           | 8.948                        | 38.04                        | 34.74                       |
|                                  | 60          | 10.07                        | 22.62                        | 122.0                       |
